# Supplementary material for: Economic Grand Rounds: Income Inequality and Depression Prevalence Across the United States: An Ecological Study
Source: Atypon-hosted journal article supplement (doi:10.1176/ps.62.7.pss6207_0710), 2011-07-01
Supplement: Messias Appendix ANY Depression.pdf [file Messias%20Appendix%20ANY%20Depression.pdf]

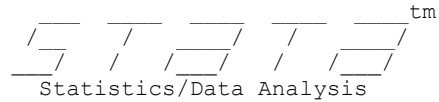

User: Messias et al

log: C:\Documents and Settings\messiaserick\My Documents\income\Any Depression GINI Erratu  
 log type: smcl  
 opened on: 25 May 2011, 10:21:42

1 . regress AnyDep Gini2006 if Gini2006<.5

| Source   | SS         | df | MS         | Number of obs = 45 |        |  |
|----------|------------|----|------------|--------------------|--------|--|
| Model    | 38.7198119 | 1  | 38.7198119 | F( 1, 43) =        | 10.02  |  |
| Residual | 166.23217  | 43 | 3.86586443 | Prob > F =         | 0.0028 |  |
| Total    | 204.951982 | 44 | 4.6579996  | R-squared =        | 0.1889 |  |
|          |            |    |            | Adj R-squared =    | 0.1701 |  |
|          |            |    |            | Root MSE =         | 1.9662 |  |

  

| AnyDep   | Coef.     | Std. Err. | t     | P> t  | [95% Conf. Interval] |          |
|----------|-----------|-----------|-------|-------|----------------------|----------|
| Gini2006 | 46.4155   | 14.66627  | 3.16  | 0.003 | 16.83814             | 75.99285 |
| _cons    | -11.82647 | 6.549348  | -1.81 | 0.078 | -25.03449            | 1.38155  |

2 . regress AnyDep Gini2006 percapitaincome if Gini2006<.5

| Source   | SS         | df | MS         | Number of obs = 45 |        |  |
|----------|------------|----|------------|--------------------|--------|--|
| Model    | 102.659305 | 2  | 51.3296524 | F( 2, 42) =        | 21.08  |  |
| Residual | 102.292677 | 42 | 2.43553994 | Prob > F =         | 0.0000 |  |
| Total    | 204.951982 | 44 | 4.6579996  | R-squared =        | 0.5009 |  |
|          |            |    |            | Adj R-squared =    | 0.4771 |  |
|          |            |    |            | Root MSE =         | 1.5606 |  |

  

| AnyDep          | Coef.     | Std. Err. | t     | P> t  | [95% Conf. Interval] |           |
|-----------------|-----------|-----------|-------|-------|----------------------|-----------|
| Gini2006        | 49.91545  | 11.66112  | 4.28  | 0.000 | 26.38235             | 73.44855  |
| percapitaincome | -.000213  | .0000416  | -5.12 | 0.000 | -.0002969            | -.0001291 |
| _cons           | -5.060939 | 5.363509  | -0.94 | 0.351 | -15.88494            | 5.763061  |

3 . regress AnyDep Gini2006 percapitaincome PercentCollege if Gini2006<.5

| Source   | SS         | df | MS         | Number of obs = 45 |        |  |
|----------|------------|----|------------|--------------------|--------|--|
| Model    | 123.547788 | 3  | 41.182596  | F( 3, 41) =        | 20.74  |  |
| Residual | 81.4041944 | 41 | 1.98546816 | Prob > F =         | 0.0000 |  |
| Total    | 204.951982 | 44 | 4.6579996  | R-squared =        | 0.6028 |  |
|          |            |    |            | Adj R-squared =    | 0.5738 |  |
|          |            |    |            | Root MSE =         | 1.4091 |  |

  

| AnyDep          | Coef.     | Std. Err. | t     | P> t  | [95% Conf. Interval] |           |
|-----------------|-----------|-----------|-------|-------|----------------------|-----------|
| Gini2006        | 44.07522  | 10.68154  | 4.13  | 0.000 | 22.50341             | 65.64703  |
| percapitaincome | -.000072  | .0000574  | -1.25 | 0.217 | -.000188             | .000044   |
| PercentCollege  | -.221861  | .0684005  | -3.24 | 0.002 | -.3599986            | -.0837235 |
| _cons           | -1.974748 | 4.935236  | -0.40 | 0.691 | -11.94166            | 7.992163  |

4 . regress AnyDep Gini2006 percapitaincome PercentCollege PercentOld if Gini2006<.5

| Source   | SS                | df        | MS                | Number of obs = | 45            |
|----------|-------------------|-----------|-------------------|-----------------|---------------|
| Model    | <b>123.795567</b> | <b>4</b>  | <b>30.9488919</b> | F( 4, 40) =     | <b>15.25</b>  |
| Residual | <b>81.1564148</b> | <b>40</b> | <b>2.02891037</b> | Prob > F =      | <b>0.0000</b> |
|          |                   |           |                   | R-squared =     | <b>0.6040</b> |
|          |                   |           |                   | Adj R-squared = | <b>0.5644</b> |
| Total    | <b>204.951982</b> | <b>44</b> | <b>4.6579996</b>  | Root MSE =      | <b>1.4244</b> |

| AnyDep          | Coef.            | Std. Err.       | t            | P> t         | [95% Conf. Interval] |                  |
|-----------------|------------------|-----------------|--------------|--------------|----------------------|------------------|
| Gini2006        | <b>43.67445</b>  | <b>10.85849</b> | <b>4.02</b>  | <b>0.000</b> | <b>21.72861</b>      | <b>65.62029</b>  |
| percapitaincome | <b>-.0000728</b> | <b>.0000581</b> | <b>-1.25</b> | <b>0.217</b> | <b>-.0001902</b>     | <b>.0000446</b>  |
| PercentCollege  | <b>-.2179938</b> | <b>.0700247</b> | <b>-3.11</b> | <b>0.003</b> | <b>-.3595189</b>     | <b>-.0764686</b> |
| PercentOld      | <b>.0444371</b>  | <b>.1271583</b> | <b>0.35</b>  | <b>0.729</b> | <b>-.2125593</b>     | <b>.3014335</b>  |
| _cons           | <b>-2.443098</b> | <b>5.165812</b> | <b>-0.47</b> | <b>0.639</b> | <b>-12.88359</b>     | <b>7.997396</b>  |

5 . log close

log: C:\Documents and Settings\messiaserick\My Documents\income\Any Depression GINI Erratu  
 log type: smcl  
 closed on: 25 May 2011, 10:24:58
