# Supplementary material for: Economic Grand Rounds: Income Inequality and Depression Prevalence Across the United States: An Ecological Study
Source: Atypon-hosted journal article supplement (doi:10.1176/ps.62.7.pss6207_0710), 2011-07-01
Supplement: Messias Appendix MAJOR Depression.pdf [file Messias%20Appendix%20MAJOR%20Depression.pdf]

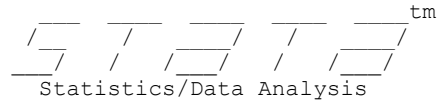

User: Messias et al

log: C:\Documents and Settings\messiaserick\My Documents\income\Major Dep GINI Erratum.sm  
 log type: smcl  
 opened on: 25 May 2011, 10:26:53

1 . regress MDep Gini2006 if Gini2006<.5

| Source   | SS         | df | MS         | Number of obs = 45 |        |  |
|----------|------------|----|------------|--------------------|--------|--|
| Model    | 4.36119686 | 1  | 4.36119686 | F( 1, 43) =        | 3.93   |  |
| Residual | 47.7668056 | 43 | 1.11085594 | Prob > F =         | 0.0540 |  |
| Total    | 52.1280024 | 44 | 1.18472733 | R-squared =        | 0.0837 |  |
|          |            |    |            | Adj R-squared =    | 0.0624 |  |
|          |            |    |            | Root MSE =         | 1.054  |  |

  

| MDep     | Coef.     | Std. Err. | t     | P> t  | [95% Conf. Interval] |         |
|----------|-----------|-----------|-------|-------|----------------------|---------|
| Gini2006 | 15.57755  | 7.861859  | 1.98  | 0.054 | -.2773972            | 31.4325 |
| _cons    | -2.942653 | 3.51078   | -0.84 | 0.407 | -10.02282            | 4.13751 |

2 . regress MDep Gini2006 percapitaincome if Gini2006<.5

| Source   | SS         | df | MS         | Number of obs = 45 |        |  |
|----------|------------|----|------------|--------------------|--------|--|
| Model    | 25.247891  | 2  | 12.6239455 | F( 2, 42) =        | 19.72  |  |
| Residual | 26.8801114 | 42 | .640002652 | Prob > F =         | 0.0000 |  |
| Total    | 52.1280024 | 44 | 1.18472733 | R-squared =        | 0.4843 |  |
|          |            |    |            | Adj R-squared =    | 0.4598 |  |
|          |            |    |            | Root MSE =         | .8     |  |

  

| MDep            | Coef.     | Std. Err. | t     | P> t  | [95% Conf. Interval] |           |
|-----------------|-----------|-----------|-------|-------|----------------------|-----------|
| Gini2006        | 17.57793  | 5.977694  | 2.94  | 0.005 | 5.514457             | 29.64141  |
| percapitaincome | -.0001217 | .0000213  | -5.71 | 0.000 | -.0001647            | -.0000787 |
| _cons           | .924151   | 2.749428  | 0.34  | 0.738 | -4.624419            | 6.472721  |

3 . regress MDep Gini2006 percapitaincome PercentCollege if Gini2006<.5

| Source   | SS         | df | MS         | Number of obs = 45 |        |  |
|----------|------------|----|------------|--------------------|--------|--|
| Model    | 29.0206315 | 3  | 9.67354383 | F( 3, 41) =        | 17.16  |  |
| Residual | 23.1073709 | 41 | .563594413 | Prob > F =         | 0.0000 |  |
| Total    | 52.1280024 | 44 | 1.18472733 | R-squared =        | 0.5567 |  |
|          |            |    |            | Adj R-squared =    | 0.5243 |  |
|          |            |    |            | Root MSE =         | .75073 |  |

  

| MDep            | Coef.     | Std. Err. | t     | P> t  | [95% Conf. Interval] |           |
|-----------------|-----------|-----------|-------|-------|----------------------|-----------|
| Gini2006        | 15.09591  | 5.690963  | 2.65  | 0.011 | 3.602782             | 26.58905  |
| percapitaincome | -.0000618 | .0000306  | -2.02 | 0.050 | -.0001236            | -3.24e-08 |
| PercentCollege  | -.0942879 | .0364427  | -2.59 | 0.013 | -.1678855            | -.0206903 |
| _cons           | 2.23574   | 2.629419  | 0.85  | 0.400 | -3.07448             | 7.545959  |

4 . regress MDep Gini2006 percapitaincome PercentCollege PercentOld if Gini2006<.5

| Source   | SS         | df | MS         | Number of obs = 45 |        |  |
|----------|------------|----|------------|--------------------|--------|--|
| Model    | 29.0624875 | 4  | 7.26562188 | F( 4, 40) =        | 12.60  |  |
| Residual | 23.0655149 | 40 | .576637873 | Prob > F =         | 0.0000 |  |
| Total    | 52.1280024 | 44 | 1.18472733 | R-squared =        | 0.5575 |  |
|          |            |    |            | Adj R-squared =    | 0.5133 |  |
|          |            |    |            | Root MSE =         | .75937 |  |

  

| MDep            | Coef.     | Std. Err. | t     | P> t  | [95% Conf. Interval] |           |
|-----------------|-----------|-----------|-------|-------|----------------------|-----------|
| Gini2006        | 15.26063  | 5.788816  | 2.64  | 0.012 | 3.560999             | 26.96027  |
| percapitaincome | -.0000615 | .000031   | -1.99 | 0.054 | -.0001241            | 1.11e-06  |
| PercentCollege  | -.0958774 | .0373311  | -2.57 | 0.014 | -.1713264            | -.0204283 |
| PercentOld      | -.0182638 | .0677899  | -0.27 | 0.789 | -.1552723            | .1187446  |
| _cons           | 2.428233  | 2.753967  | 0.88  | 0.383 | -3.137741            | 7.994208  |

5 . log close  
 log: C:\Documents and Settings\messiaserick\My Documents\income\Major Dep GINI Erratum.smcl  
 log type: smcl  
 closed on: 25 May 2011, 10:27:35
